# Supplementary material
Source: publisher figshare collection journal article supplement (https://brill.figshare.com/ndownloader/files/34306355)
Supplement: Supplementary file 1 [file 34306355]

## Sheet: Sheet 1
Table A1. Average, minimum and maximum values of bioclimatic variables for the species of Diosmeae
Species	BIO1: Annual Mean Temperature (average)	BIO2: Mean Diurnal Range (average)	BIO3: Isothermality (BIO2/BIO7) * 100 (average)	BIO4: Temperature Seasonality (average)	BIO5: Max Temperature of Warmest Month (average)	BIO6: Min Temperature of Coldest Month (average)	BIO7: Temperature Annual Range (BIO5-BIO6) (average)	BIO8: Mean Temperature of Wettest Quarter (average)	BIO9: Mean Temperature of Driest Quarter (average)	BIO10: Mean Temperature of Warmest Quarter (average)	BIO11: Mean Temperature of Coldest Quarter (average)	BIO12: Annual Precipitation (average)	BIO13: Precipitation of Wettest Month (average)	BIO14: Precipitation of Driest Month (average)	BIO15: Precipitation Seasonality (average)	BIO16: Precipitation of Wettest Quarter (average)	BIO17: Precipitation of Driest Quarter (average)	BIO18: Precipitation of Warmest Quarter (average)	BIO19: Precipitation of Coldest Quarter (average)	Altitude (average)	BIO1: Annual Mean Temperature (min)	BIO2: Mean Diurnal Range (min)	BIO3: Isothermality (BIO2/BIO7) * 100 (min)	BIO4: Temperature Seasonality (min)	BIO5: Max Temperature of Warmest Month (min)	BIO6: Min Temperature of Coldest Month (min)	BIO7: Temperature Annual Range (BIO5-BIO6) (min)	BIO8: Mean Temperature of Wettest Quarter (min)	BIO9: Mean Temperature of Driest Quarter (min)	BIO10: Mean Temperature of Warmest Quarter (min)	BIO11: Mean Temperature of Coldest Quarter (min)	BIO12: Annual Precipitation (min)	BIO13: Precipitation of Wettest Month (min)	BIO14: Precipitation of Driest Month (min)	BIO15: Precipitation Seasonality (min)	BIO16: Precipitation of Wettest Quarter (min)	BIO17: Precipitation of Driest Quarter (min)	BIO18: Precipitation of Warmest Quarter (min)	BIO19: Precipitation of Coldest Quarter (min)	Altitude (min)	BIO1: Annual Mean Temperature (max)	BIO2: Mean Diurnal Range (max)	BIO3: Isothermality (BIO2/BIO7) * 100 (max)	BIO4: Temperature Seasonality (max)	BIO5: Max Temperature of Warmest Month (max)	BIO6: Min Temperature of Coldest Month (max)	BIO7: Temperature Annual Range (BIO5-BIO6) (max)	BIO8: Mean Temperature of Wettest Quarter (max)	BIO9: Mean Temperature of Driest Quarter (max)
Acmadenia alternifolia	161.241	97.5517	56.8276	2499.72	243.345	72.6207	170.724	142.552	175.138	192.172	129.034	923.103	96.5862	64.8621	12.0345	267.655	205.241	214.552	230.103	239.241	123	95	55	2412	234	19	166	137	84	165	79	709	75	39	10	211	135	192	142	131	165	120	58	3349	251	76	215	164	194
Adenandra marginata	158.5	125	54.2083	3666.29	278.667	51.125	227.542	121.292	203.958	204.167	111.458	665.583	101.708	19.7083	53.4583	292.125	65.9167	67.5417	287.167	475.167	107	87	50	2900	231	4	171	68	153	154	60	254	30	5	19	83	19	19	77	16	177	161	56	4546	326	87	284	159	231
Adenandra multiflora	155.25	95.75	51.5	3131.25	252	68	184	118	195.25	195.25	116.25	820.25	122.25	22.75	55.25	353	77.75	77.75	351.75	173.25	150	88	51	2738	246	64	168	111	191	191	111	626	91	20	50	263	65	65	263	42	161	105	52	3397	266	78	200	126	203
Adenandra rotundifolia	175	107.5	52.5	3191.25	274	72.5	201.5	152.75	206.75	214.75	134	533.75	63.25	28.051	24	165.5	94.75	105.5	160.75	75	173	87	50	2900	258	64	171	136	204	209	131	491	57	22	20	161	72	82	152	16	179	117	54	3358	282	87	213	161	209
Adenandra uniflora	162.197	94.9474	54.1184	2762.21	251.908	78.25	173.658	130.921	196.276	197.013	126.947	857.829	135.553	25.3158	56.1579	382.658	84.5921	86.4211	379.934	196.118	146	73	50	2252	232	45	136	106	180	180	106	187	36	2	21	94	11	14	91	16	191	165	59	4474	338	96	286	161	242
Agathosma anomala	141.25	131.5	54.5	3850.25	270.25	31	239.25	98	190	190	92.5	627.5	98	16.75	58	284.25	61	61	279.75	849.5	103	117	53	3503	231	-2	217	63	151	151	56	454	68	10	47	195	45	45	194	348	166	140	56	4175	298	62	254	125	215
Agathosma betulina	149.536	127.857	54.8571	3719.21	272.357	41.2143	231.143	108.536	193.143	195.607	101.893	588.679	93.2857	16.1071	58.1786	263.25	59.25	61.4286	258.821	657.964	112	88	52	2450	239	2	162	69	127	161	62	299	52	5	12	142	24	27	140	92	180	152	60	4426	314	82	274	165	229
Agathosma bisulca	170.348	135.739	56.5652	3719.04	295.217	57.7391	237.478	128.522	215.087	215.391	121.783	351.913	60	8.04348	62.8696	164.435	30.3913	32.5217	161.957	335.13	143	82	50	2141	235	25	141	97	186	186	90	187	36	2	32	94	11	14	91	16	191	165	60	4474	338	94	286	150	242
Agathosma ciliaris	160.412	92.3235	53.3529	2796.91	249.265	78.0294	171.235	130.853	195.265	195.853	124.882	739	116.441	21.6176	54.1471	325.824	73.7647	75.0882	323.529	196.765	151	73	51	2252	232	12	136	106	184	184	91	160	20	6	21	54	27	27	46	30	179	160	55	4908	308	96	296	162	217
Agathosma crentulata	170.04	137.48	56	3831.52	298.12	55.36	242.76	125	216.12	216.44	120.2	385.12	64.28	8.7	62.32	179.44	32.88	35.6	177.08	338.2	123	83	51	2747	249	8	162	78	173	175	72	223	43	4	35	112	16	20	108	39	190	161	59	4377	335	87	277	141	241
Agathosma marifolia	165.9	141	54.5	4124	300.7	44.9	255.8	119.6	215.2	216.6	112.6	402.3	65.1	9.2	59.3	183.1	37.5	38.7	180.5	418.5	123	123	52	3741	259	0	229	78	173	175	71	223	43	4	33	112	16	20	108	153	190	161	58	4534	335	72	277	151	241
Agathosma serpyllacea	166.756	96.6	53.6	2783.84	254.756	76.8667	177.889	141.689	198.333	201.733	131.4	596.711	79	26.3778	33.7111	219.511	86.5778	92.1111	213.156	132.022	143	72	49	2178	230	34	137	117	112	180	106	405	45	16	10	119	56	56	104	7	179	145	58	3802	289	95	255	169	210
Calodendrum capense	165.417	109.603	57.2781	2737.58	256.94	67.5033	189.437	164.728	151.397	199.887	130.159	729.881	86.1391	37.1987	25.5033	240.47	125.152	175.073	182.305	355.477	132	79	53	1889	237	4	139	118	84	175	80	260	30	10	10	78	38	40	55	1	185	157	61	4124	303	107	275	221	208
Coleonema album	162.178	92.8471	54.0701	2715.32	249.395	79.2293	170.166	133.089	194.369	196.662	128.038	779.841	119.975	25.1146	50.7516	337.268	84.1529	86.7707	331.274	175.503	146	72	51	2178	230	35	136	113	127	180	108	354	44	7	10	120	27	27	103	5	176	142	60	4090	292	97	257	166	212
Diosma acmaeophylla	164.435	142.609	55.8696	3985.35	296.391	43.6087	252.783	127	206	213.13	112.261	310.522	50.4348	8.30435	55.3478	137.696	31.7826	34.4348	134.696	578.783	115	87	50	2587	252	-2	171	69	111	167	62	126	19	2	18	47	8	11	32	16	187	166	62	5104	328	87	305	203	236
Diosma hirsuta	159.241	103.143	53.7291	3076.78	259.044	68.8522	190.192	126.438	196.833	198.133	120.286	865.936	134.823	25.4335	55.6256	383.03	84.4384	86.8571	378.606	270.389	134	73	51	2283	228	23	137	95	107	174	88	305	36	6	15	90	23	23	79	16	179	157	58	4316	318	97	273	185	228
Diosma meyeriana	153.571	149.286	55	4326.14	295	26.1429	268.857	112.714	204.571	206.429	97.1429	318.714	53.4286	7.85714	55.5714	145.286	32.2857	33.2857	141	881	117	137	52	3924	249	3	243	74	165	165	66	121	16	4	32	46	14	17	46	234	179	163	57	4762	321	51	293	155	230
Diosma oppositifolia	159.385	92.7162	53.7162	2767.38	248.338	77.3108	171.027	128.338	193.831	194.176	124.128	762.865	119.851	22.3311	55.3243	337.642	75.6622	76.6622	334.554	202.966	144	73	51	2141	232	24	136	109	180	180	107	260	30	5	17	78	19	21	63	13	170	157	58	4124	299	96	275	169	211
Empleurum unicapsulare	151.607	115.978	56.1685	3088.02	255.562	50.9663	204.596	141.056	152.506	190.663	112.135	680.809	82.0787	35.0674	27.0899	229.449	117.573	136.337	202.742	580.528	117	79	51	2194	225	6	146	74	75	159	66	149	23	6	10	56	22	22	23	9	181	164	60	4594	319	95	305	204	230
Euchaetis glomerata	143.889	136.222	54.6111	3997.39	275.667	28.4444	247.222	100	193.5	193.833	92.8889	524.611	84.7778	13.2778	58.7778	238.889	52.2778	52.7222	234.722	852.222	107	82	51	2755	231	4	159	68	153	154	60	139	25	3	17	61	17	17	59	161	189	169	57	5184	350	78	315	149	252
Macrostylis crassifolia	168.214	135.5	54.8571	3908.71	296.071	52.3571	243.714	123.857	214.714	215.643	117.286	323.5	54.3571	7.35714	61.7143	150.929	29	31.2143	148.071	389.214	129	83	49	2747	249	0	162	78	175	186	71	229	42	3	35	114	15	18	110	39	187	158	60	4668	318	89	283	146	231
[truncated: 12 more columns]
